# Supplementary material
Source: MDPI journal article supplement (https://www.mdpi.com/2313-433X/9/3/69)
Supplement: s1 [file s1]

## Article

# GANs for Medical Image Synthesis: An Empirical Study

Youssef Skandarani <sup>1,2,\*</sup>, Pierre-Marc Jodoin <sup>3</sup> and Alain Lalande <sup>1,4</sup>

<sup>1</sup> University of Bourgogne Franche-Comte, 21000 Dijon, France

<sup>2</sup> CASIS Inc., 21800 Quetigny, France

<sup>3</sup> Department of Computer Science, University of Sherbrooke, Sherbrooke, QC J1K 2R1, Canada

<sup>4</sup> Department of Medical Imaging, University Hospital of Dijon, 21079 Dijon, France

\* Correspondence: [youssef.skandarani@outlook.com](mailto:youssef.skandarani@outlook.com);

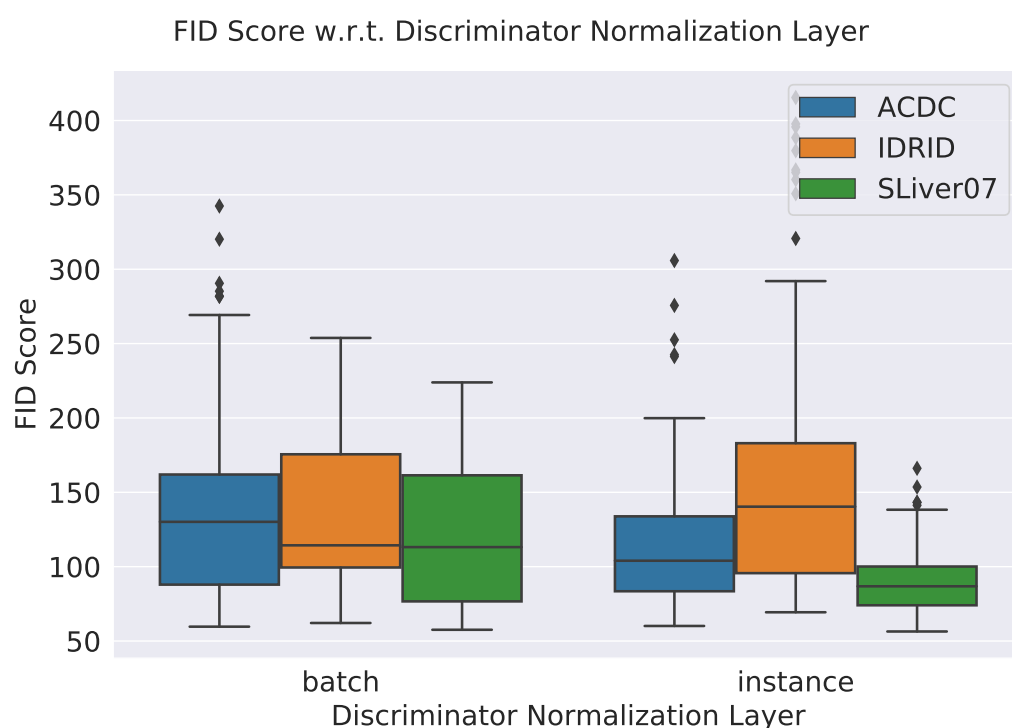

**Figure S1.** FID for different discriminator normalization layers

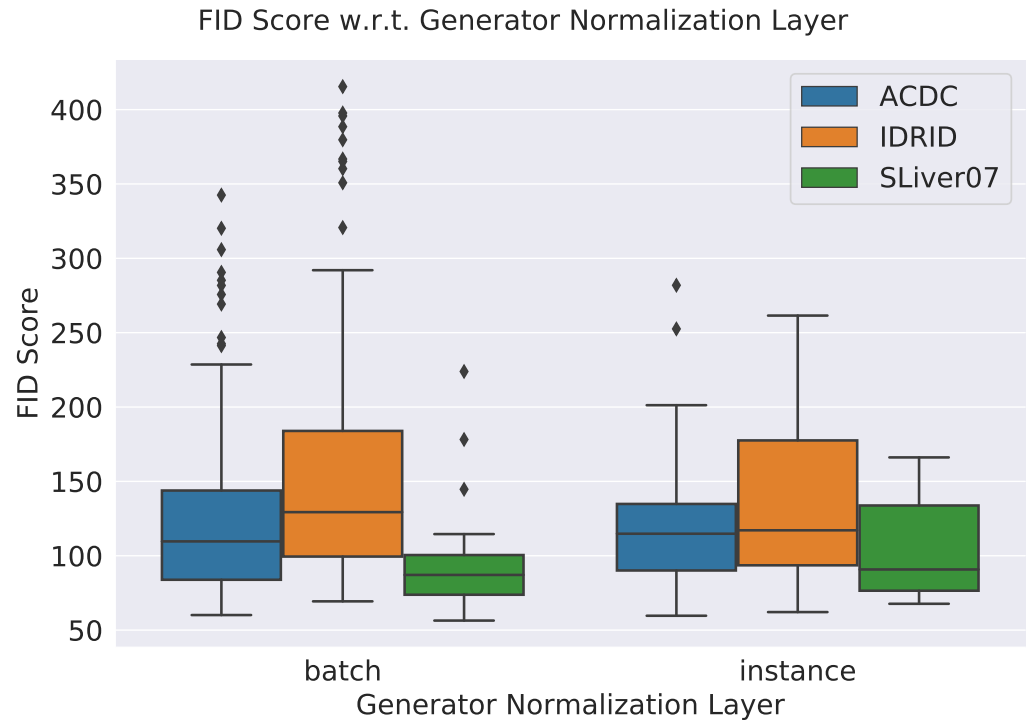

**Figure S2.** FID for different generator normalization layers

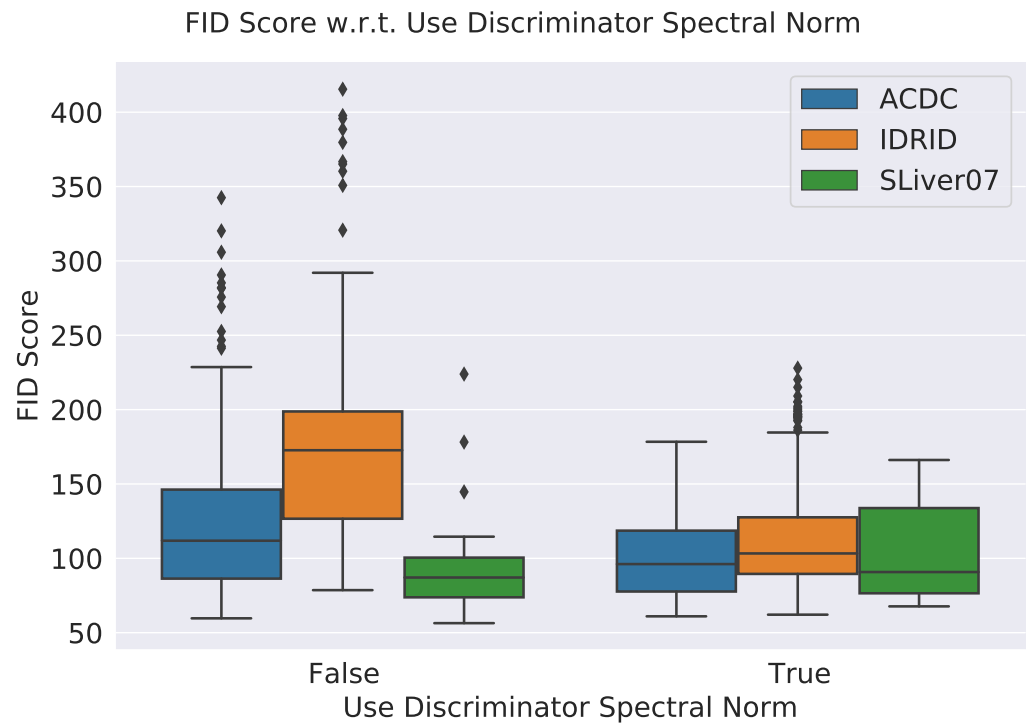

**Figure S3.** FID for whether discriminator uses spectral normalization or not.

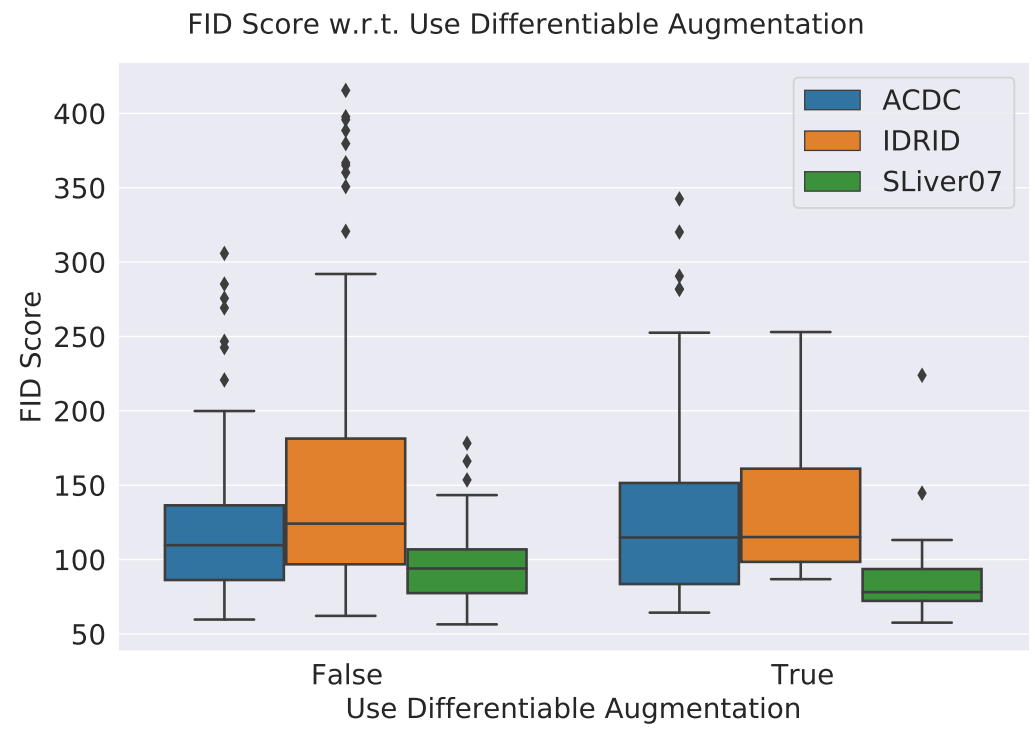

**Figure S4.** FID for whether we use differentiable augmentation or not.

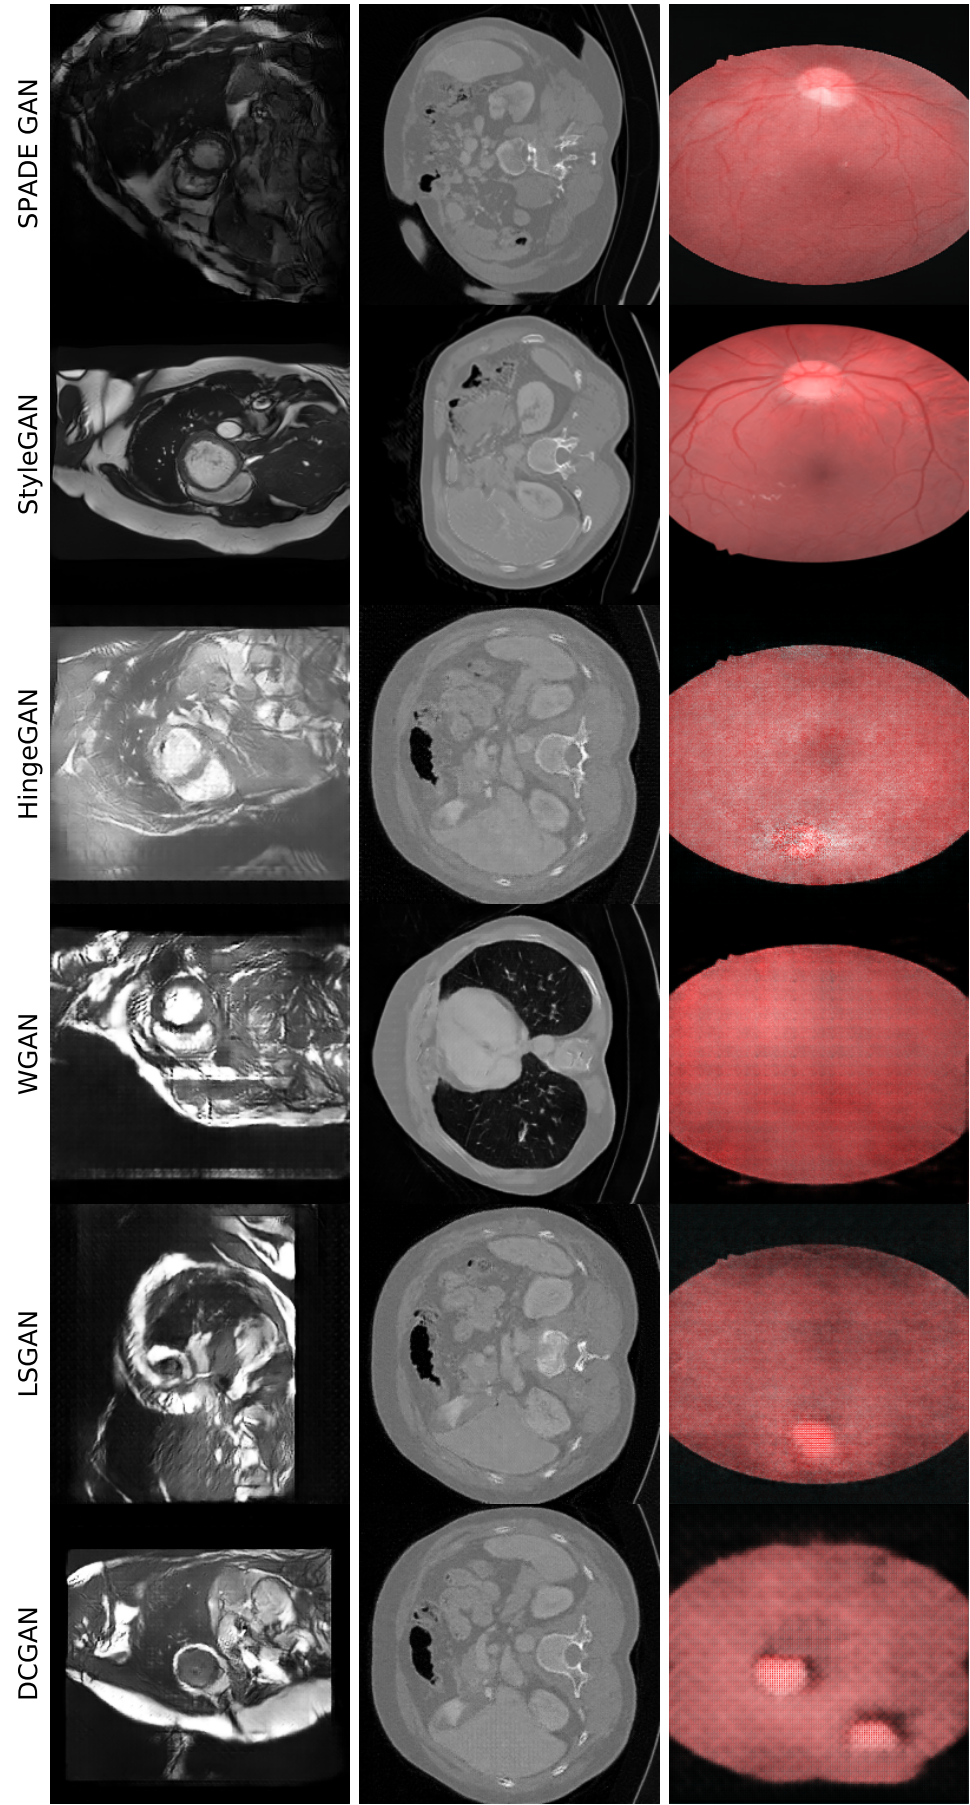

Figure S5. Examples of generated samples

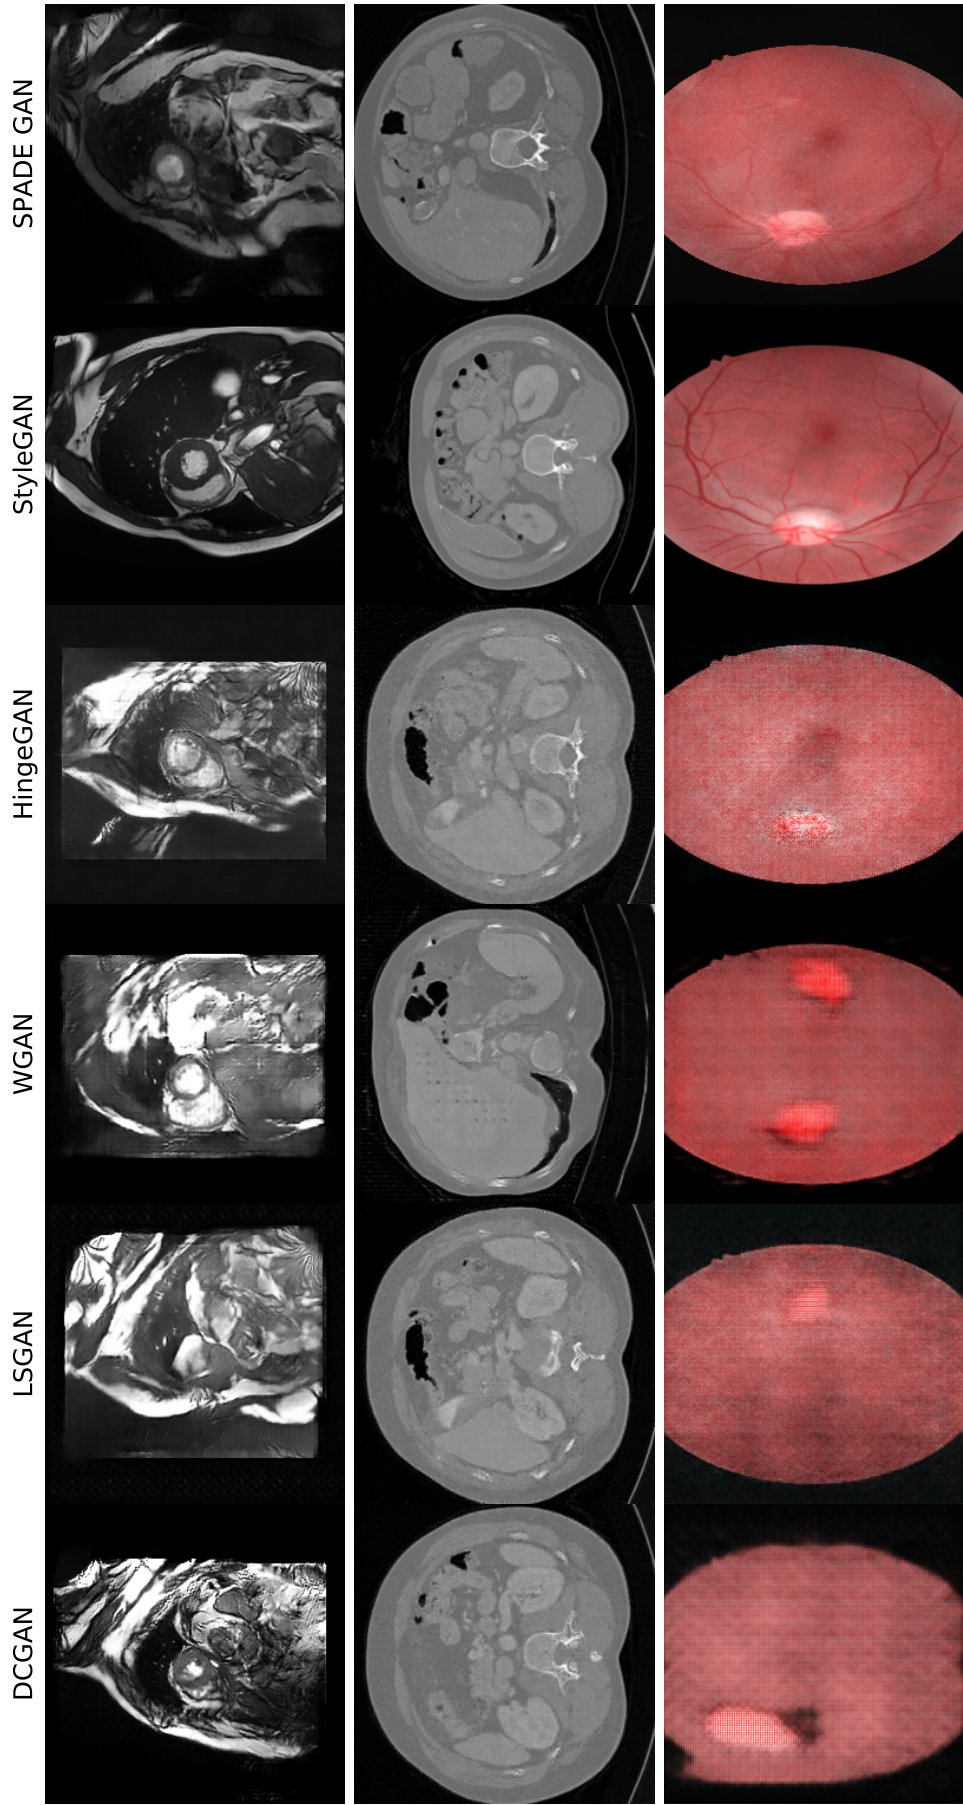

Figure S6. More Examples of generated samples



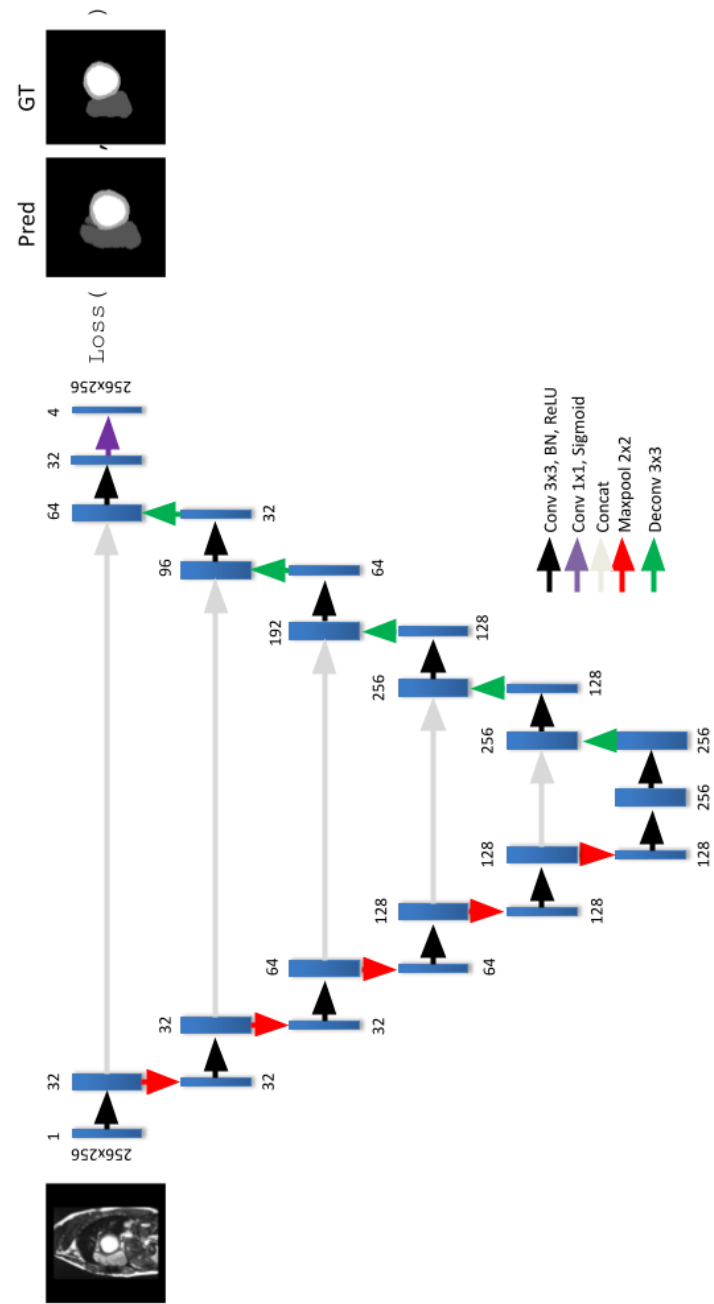

Figure S7. Architecture of the U-Net used for the segmentation task.
